# Supplementary material
Source: PubMed Central journal article supplement (PMC7350082)
Supplement: 2020-00033R1_Production_Supplemental_Tables_online_supp.pdf [file 2020-00033R1_Production_Supplemental_Tables_online_supp.pdf]

**Supplementary Table 1 RNAscope® workflow for mIFISH.**

|                                                          | mIFISH                                              | Dual mRNA mIFISH                                     |
|----------------------------------------------------------|-----------------------------------------------------|------------------------------------------------------|
| <b>De-Paraffinization</b>                                |                                                     |                                                      |
| <b>Pre-Treatment 1</b>                                   | <b>10 min at RT</b>                                 | <b>10 min at RT</b>                                  |
| <b>Pre-Treatment 2</b>                                   | <b>15 min at 98°-102°C</b>                          | <b>15 min at 98°-102°C</b>                           |
| <b>Pre-Treatment 3</b>                                   | <b>15 min at 40°C</b>                               | <b>15 min at 40°C</b>                                |
| <b>Probe Hybridization</b>                               | <b>2hrs at 40°C</b>                                 | <b>C2 probe 1:50 in C1 2h at 40°C</b>                |
| <b>Amplification 1</b>                                   | <b>30 min at 40°C</b>                               | <b>30 min at 40°C</b>                                |
| <b>Amplification 2</b>                                   | <b>15 min at 40°C</b>                               | <b>15 min at 40°C</b>                                |
| <b>Amplification 3</b>                                   | <b>30 min at 40°C</b>                               | <b>30 min at 40°C</b>                                |
| <b>Amplification 4</b>                                   | <b>15 min at 40°C</b>                               | <b>15 min at 40°C</b>                                |
| <b>Amplification 5</b>                                   | <b>1h at RT</b>                                     | <b>1h at RT</b>                                      |
| <b>Amplification 6</b>                                   | <b>15 min at RT</b>                                 | <b>15 min at RT</b>                                  |
| <b>Chromogen or Immunofluorescent signal development</b> | <b>10 min at RT<br/>15 min at RT<br/>TSA 1:3000</b> | <b>C2 signal development 15 min at RT TSA 1:3000</b> |
| <b>Counterstain or continuing with antibody staining</b> |                                                     | <b>HRP-Blocker 15 min at 40°C</b>                    |
|                                                          |                                                     | <b>Amplification 7</b>                               |
|                                                          |                                                     | <b>Amplification 8</b>                               |
|                                                          |                                                     | <b>Amplification 9</b>                               |
|                                                          |                                                     | <b>Amplification 10</b>                              |
|                                                          |                                                     | <b>C1 signal development 15 min at RT TSA 1:3000</b> |
|                                                          |                                                     | <b>continuing with antibody staining</b>             |

**Supplementary Table 2 Secondary antibodies tested for mIFISH compatibility.**

| Antibody/Target          | Species | Reactivity | Conjugate           | Isotype   | Clone      | Cat. Log. # | Vendor       | Antibody dilution |
|--------------------------|---------|------------|---------------------|-----------|------------|-------------|--------------|-------------------|
| Goat anti-mouse AF647    | Goat    | Mouse      | Alexa Fluor®<br>647 | IgG (H+L) | polyclonal | A-21236     | ThermoFisher | 1:100             |
| Donkey anti-mouse AF488  | Donkey  | Mouse      | Alexa Fluor®<br>488 | IgG (H+L) | polyclonal | A-21202     | ThermoFisher | 1:100             |
| Donkey anti-rabbit AF488 | Donkey  | Rabbit     | Alexa Fluor®<br>488 | IgG (H+L) | polyclonal | A-21206     | ThermoFisher | 1:100             |
| Goat anti-rabbit AF647   | Goat    | Rabbit     | Alexa Fluor®<br>647 | IgG (H+L) | polyclonal | A-21245     | ThermoFisher | 1:100             |
